# Supplementary material for: Association of Salt Intake with Muscle Strength and Physical Performance in Middle-Aged to Older Chinese: The Guangzhou Biobank Cohort Study
Source: MDPI journal article supplement (doi:10.3390/nu15030516), 2023-01-19
Supplement: s1 [file s1]

| <b>General salt intake</b>            |  | <b>Adjusted <math>\beta</math> (95% CI)<sup>†</sup></b> |
|---------------------------------------|--|---------------------------------------------------------|
|                                       |  | <b>AGS<sub>max</sub>, kg</b>                            |
| Light ( <i>n</i> =1925)               |  | 0.00                                                    |
| Moderate ( <i>n</i> =1789)            |  | 0.24 (−0.15, 0.63)                                      |
| Salty ( <i>n</i> =1153)               |  | −0.53 (−0.97, −0.08)                                    |
| <b>Salt intake in the last 7 days</b> |  |                                                         |
|                                       |  | <b>AGS<sub>max</sub>, kg</b>                            |
| Light to moderate ( <i>n</i> =3702)   |  | 0.00                                                    |
| Salty ( <i>n</i> =1165)               |  | −0.36 (−0.76, 0.04)                                     |

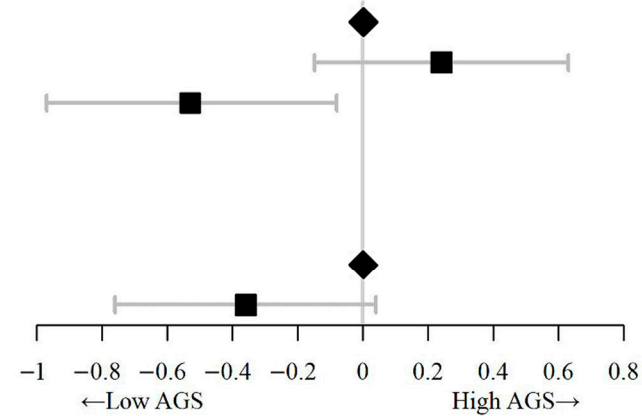

**Figure S1 Association of salt intake with absolute grip strength (kg) on 4867 participants of the Guangzhou Biobank Cohort Study**

CI=confidence interval, AGS<sub>max</sub>=maximum of the right or left absolute grip strength.

<sup>†</sup>Adjusted  $\beta$  (95% CI): adjusted for sex, age, education, family income, occupation, physical activity, smoking status, alcohol use, body mass index (BMI), self-rated health, and self-reported hypertension.—

**Table S1 Associations of general salt intake with grip strength, timed up-and-go test, and falls in 2981 manual workers and 1886 non-manual workers of the Guangzhou Biobank Cohort Study**

|                                                 | Manual workers |                      |                         | Non-manual workers |                       |                         | <i>P</i> for interaction |
|-------------------------------------------------|----------------|----------------------|-------------------------|--------------------|-----------------------|-------------------------|--------------------------|
|                                                 | Light          | Moderate             | Salty                   | Light              | Moderate              | Salty                   |                          |
| AGS <sub>max</sub> , kg                         |                |                      |                         |                    |                       |                         | 0.65                     |
| Crude $\beta$ (95% CI)                          | 0.00           | 0.96 (0.30, 1.62) ** | 1.06 (0.30, 1.81) **    | 0.00               | 1.92 (1.02, 2.82) *** | 1.42 (0.41, 2.43) **    |                          |
| Adjusted $\beta$ (95% CI) $\xi$                 | 0.00           | 0.27 (−0.22, 0.76)   | −0.37 (−0.93, 0.19)     | 0.00               | 0.18 (−0.47, 0.82)    | −0.78 (−1.52, −0.05) *  |                          |
| RGS <sub>max</sub> , kg per kg/m <sup>2</sup>   |                |                      |                         |                    |                       |                         | 0.92                     |
| Crude $\beta$ (95% CI)                          | 0.00           | 0.03 (−0.005, 0.06)  | 0.02 (−0.01, 0.05)      | 0.00               | 0.08 (0.04, 0.12) *** | 0.05 (0.004, 0.09) *    |                          |
| Adjusted $\beta$ (95% CI) $\xi$                 | 0.00           | −0.005 (−0.03, 0.02) | −0.04 (−0.07, −0.01) ** | 0.00               | 0.00 (−0.03, 0.03)    | −0.04 (−0.08, −0.01) *  |                          |
| RGS <sub>mean</sub> , kg per kg/m <sup>2</sup>  |                |                      |                         |                    |                       |                         | 0.93                     |
| Crude $\beta$ (95% CI)                          | 0.00           | 0.02 (−0.01, 0.05)   | 0.02 (−0.01, 0.05)      | 0.00               | 0.08 (0.04, 0.11) *** | 0.05 (0.01, 0.10) *     |                          |
| Adjusted $\beta$ (95% CI) $\xi$                 | 0.00           | −0.01 (−0.03, 0.02)  | −0.04 (−0.07, −0.01) ** | 0.00               | 0.002 (−0.03, 0.03)   | −0.04 (−0.07, −0.005) * |                          |
| RGS <sub>left</sub> , kg per kg/m <sup>2</sup>  |                |                      |                         |                    |                       |                         | 0.88                     |
| Crude $\beta$ (95% CI)                          | 0.00           | 0.02 (−0.01, 0.05)   | 0.02 (−0.02, 0.05)      | 0.00               | 0.07 (0.04, 0.11) *** | 0.05 (0.001, 0.09) *    |                          |
| Adjusted $\beta$ (95% CI) $\xi$                 | 0.00           | −0.01 (−0.03, 0.02)  | −0.04 (−0.07, −0.02) ** | 0.00               | 0.001 (−0.03, 0.03)   | −0.04 (−0.08, −0.01) *  |                          |
| RGS <sub>right</sub> , kg per kg/m <sup>2</sup> |                |                      |                         |                    |                       |                         | 0.96                     |
| Crude $\beta$ (95% CI)                          | 0.00           | 0.03 (−0.004, 0.06)  | 0.02 (−0.01, 0.06)      | 0.00               | 0.08 (0.04, 0.11) *** | 0.06 (0.01, 0.10) *     |                          |
| Adjusted $\beta$ (95% CI) $\xi$                 | 0.00           | −0.004 (−0.03, 0.02) | −0.04 (−0.06, −0.01) ** | 0.00               | 0.002 (−0.03, 0.03)   | −0.03 (−0.07, 0.001)    |                          |
| TUGT score, second                              |                |                      |                         |                    |                       |                         | 0.09                     |
| Crude $\beta$ (95% CI)                          | 0.00           | 0.12 (0.03, 0.20) ** | 0.12 (0.03, 0.22) *     | 0.00               | −0.06 (−0.16, 0.04)   | 0.08 (−0.03, 0.19)      |                          |
| Adjusted $\beta$ (95% CI) $\xi$                 | 0.00           | 0.07 (0.002, 0.15) * | 0.12 (0.03, 0.20) **    | 0.00               | −0.05 (−0.14, 0.03)   | 0.02 (−0.08, 0.12)      |                          |
| Falls in the past 6 months                      |                |                      |                         |                    |                       |                         | 0.73                     |
| Crude OR (95% CI)                               | 1.00           | 1.07 (0.75, 1.53)    | 1.25 (0.85, 1.84)       | 1.00               | 0.81 (0.52, 1.24)     | 1.18 (0.76, 1.84)       |                          |
| Adjusted OR (95% CI) $\xi$                      | 1.00           | 1.09 (0.76, 1.57)    | 1.36 (0.92, 2.01)       | 1.00               | 0.85 (0.55, 1.33)     | 1.23 (0.77, 1.95)       |                          |

CI=confidence interval, OR=odds ratio, AGS<sub>max</sub>=maximum of the right or left absolute grip strength, RGS<sub>max</sub>=maximum of the right or left relative grip strength, RGS<sub>mean</sub>=average of the right

and left relative grip strength, RGS<sub>left</sub>=the left relative grip strength, RGS<sub>right</sub>=the right relative grip strength, TUGT=timed up-and-go test.

‡Adjusted for sex, age, education, family income, physical activity, smoking status, alcohol use, body mass index (BMI, except for RGS), self-rated health, and self-reported hypertension.

\* $P<0.05$ , \*\* $P<0.01$ , \*\*\* $P<0.001$ .

**Table S2 Associations of general salt intake with grip strength, timed up-and-go test, and falls in 3571 middle-aged participants (50-64 years) and 1296 older participants (≥65 years) of the Guangzhou Biobank Cohort Study**

|                                                 | Middle-aged participants (50-64 years) |                       |                          | Older participants (≥65 years) |                      |                         | <i>P</i> for interaction |
|-------------------------------------------------|----------------------------------------|-----------------------|--------------------------|--------------------------------|----------------------|-------------------------|--------------------------|
|                                                 | Light                                  | Moderate              | Salty                    | Light                          | Moderate             | Salty                   |                          |
| AGS <sub>max</sub> , kg                         |                                        |                       |                          |                                |                      |                         | 0.36                     |
| Crude β (95% CI)                                | 0.00                                   | 1.57 (0.94, 2.19) *** | 1.09 (0.37, 1.80) **     | 0.00                           | 0.62 (−0.40, 1.64)   | 1.49 (0.34, 2.65) *     |                          |
| Adjusted β (95% CI) ‡                           | 0.00                                   | 0.36 (−0.11, 0.82)    | −0.32 (−0.85, 0.21)      | 0.00                           | 0.05 (−0.70, 0.81)   | −0.57 (−1.44, 0.30)     |                          |
| RGS <sub>max</sub> , kg per kg/m <sup>2</sup>   |                                        |                       |                          |                                |                      |                         | 0.43                     |
| Crude β (95% CI)                                | 0.00                                   | 0.05 (0.02, 0.08) *** | 0.03 (−0.01, 0.06)       | 0.00                           | 0.02 (−0.02, 0.07)   | 0.05 (−0.01, 0.10)      |                          |
| Adjusted β (95% CI) ‡                           | 0.00                                   | 0.001 (−0.02, 0.02)   | −0.03 (−0.06, −0.01) *   | 0.00                           | −0.01 (−0.04, 0.03)  | −0.05 (−0.09, −0.01) *  |                          |
| RGS <sub>mean</sub> , kg per kg/m <sup>2</sup>  |                                        |                       |                          |                                |                      |                         | 0.46                     |
| Crude β (95% CI)                                | 0.00                                   | 0.05 (0.02, 0.08) *** | 0.03 (−0.01, 0.06)       | 0.00                           | 0.02 (−0.02, 0.07)   | 0.05 (−0.01, 0.10)      |                          |
| Adjusted β (95% CI) ‡                           | 0.00                                   | 0.00002 (−0.02, 0.02) | −0.03 (−0.05, −0.01) *   | 0.00                           | −0.01 (−0.04, 0.03)  | −0.05 (−0.09, −0.01) *  |                          |
| RGS <sub>left</sub> , kg per kg/m <sup>2</sup>  |                                        |                       |                          |                                |                      |                         | 0.53                     |
| Crude β (95% CI)                                | 0.00                                   | 0.05 (0.02, 0.08) **  | 0.02 (−0.01, 0.05)       | 0.00                           | 0.03 (−0.02, 0.07)   | 0.05 (−0.01, 0.10)      |                          |
| Adjusted β (95% CI) ‡                           | 0.00                                   | −0.003 (−0.02, 0.02)  | −0.03 (−0.06, −0.01) **  | 0.00                           | −0.004 (−0.04, 0.03) | −0.05 (−0.09, −0.01) *  |                          |
| RGS <sub>right</sub> , kg per kg/m <sup>2</sup> |                                        |                       |                          |                                |                      |                         | 0.40                     |
| Crude β (95% CI)                                | 0.00                                   | 0.05 (0.02, 0.08) *** | 0.03 (−0.001, 0.06)      | 0.00                           | 0.02 (−0.02, 0.07)   | 0.05 (−0.004, 0.10)     |                          |
| Adjusted β (95% CI) ‡                           | 0.00                                   | 0.003 (−0.02, 0.02)   | −0.02 (−0.05, −0.0001) * | 0.00                           | −0.01 (−0.04, 0.03)  | −0.04 (−0.08, −0.003) * |                          |
| TUGT score, second                              |                                        |                       |                          |                                |                      |                         | 0.24                     |
| Crude β (95% CI)                                | 0.00                                   | 0.02 (−0.03, 0.07)    | 0.07 (0.01, 0.13) *      | 0.00                           | 0.09 (−0.08, 0.25)   | 0.15 (−0.04, 0.34)      |                          |
| Adjusted β (95% CI) ‡                           | 0.00                                   | −0.004 (−0.06, 0.05)  | 0.03 (−0.03, 0.09)       | 0.00                           | 0.07 (−0.09, 0.23)   | 0.17 (−0.01, 0.36)      |                          |

|                                   |      |                   |                   |      |                   |                   |      |
|-----------------------------------|------|-------------------|-------------------|------|-------------------|-------------------|------|
| Falls in the past 6 months        |      |                   |                   |      |                   |                   | 0.92 |
| Crude OR (95% CI)                 | 1.00 | 0.98 (0.70, 1.36) | 1.22 (0.85, 1.74) | 1.00 | 0.89 (0.55, 1.43) | 1.18 (0.72, 1.96) |      |
| Adjusted OR (95% CI) <sup>‡</sup> | 1.00 | 1.02 (0.73, 1.44) | 1.26 (0.87, 1.81) | 1.00 | 0.94 (0.58, 1.52) | 1.34 (0.79, 2.25) |      |

CI=confidence interval, OR=odds ratio, AGS<sub>max</sub>=maximum of the right or left absolute grip strength, RGS<sub>max</sub>=maximum of the right or left relative grip strength, RGS<sub>mean</sub>=average of the right and left relative grip strength, RGS<sub>left</sub>=the left relative grip strength, RGS<sub>right</sub>=the right relative grip strength, TUGT=timed up-and-go test.

<sup>‡</sup>Adjusted for sex, education, family income, occupation, physical activity, smoking status, alcohol use, body mass index (BMI, except for RGS), self-rated health, and self-reported hypertension.

\**P*<0.05, \*\**P*<0.01, \*\*\**P*<0.001.

**Table S3 Associations of general salt intake with grip strength, timed up-and-go test, and falls in 3942 participants with good self-rated health of the Guangzhou Biobank Cohort Study**

|                                                 | Participants with good self-rated health |                       |                         |
|-------------------------------------------------|------------------------------------------|-----------------------|-------------------------|
|                                                 | Light                                    | Moderate              | Salty                   |
| AGS <sub>max</sub> , kg                         |                                          |                       |                         |
| Crude $\beta$ (95% CI)                          | 0.00                                     | 1.24 (0.63, 1.84) *** | 1.29 (0.60, 1.97) ***   |
| Adjusted $\beta$ (95% CI) $\xi$                 | 0.00                                     | 0.35 (−0.10, 0.81)    | −0.31 (−0.83, 0.22)     |
| RGS <sub>max</sub> , kg per kg/m <sup>2</sup>   |                                          |                       |                         |
| Crude $\beta$ (95% CI)                          | 0.00                                     | 0.04 (0.02, 0.07) **  | 0.04 (0.005, 0.07) *    |
| Adjusted $\beta$ (95% CI) $\xi$                 | 0.00                                     | 0.004 (−0.02, 0.02)   | −0.03 (−0.06, −0.01) *  |
| RGS <sub>mean</sub> , kg per kg/m <sup>2</sup>  |                                          |                       |                         |
| Crude $\beta$ (95% CI)                          | 0.00                                     | 0.04 (0.02, 0.07) **  | 0.04 (0.01, 0.07) *     |
| Adjusted $\beta$ (95% CI) $\xi$                 | 0.00                                     | 0.004 (−0.02, 0.02)   | −0.03 (−0.05, −0.01) *  |
| RGS <sub>left</sub> , kg per kg/m <sup>2</sup>  |                                          |                       |                         |
| Crude $\beta$ (95% CI)                          | 0.00                                     | 0.04 (0.02, 0.07) **  | 0.03 (0.001, 0.06) *    |
| Adjusted $\beta$ (95% CI) $\xi$                 | 0.00                                     | 0.004 (−0.02, 0.02)   | −0.04 (−0.06, −0.01) ** |
| RGS <sub>right</sub> , kg per kg/m <sup>2</sup> |                                          |                       |                         |
| Crude $\beta$ (95% CI)                          | 0.00                                     | 0.04 (0.02, 0.07) **  | 0.04 (0.01, 0.07) *     |
| Adjusted $\beta$ (95% CI) $\xi$                 | 0.00                                     | 0.004 (−0.02, 0.02)   | −0.03 (−0.05, −0.002) * |
| TUGT score, second                              |                                          |                       |                         |
| Crude $\beta$ (95% CI)                          | 0.00                                     | 0.05 (−0.02, 0.12)    | 0.08 (0.01, 0.16) *     |
| Adjusted $\beta$ (95% CI) $\xi$                 | 0.00                                     | 0.01 (−0.06, 0.07)    | 0.03 (−0.04, 0.11)      |
| Falls in the past 6 months                      |                                          |                       |                         |
| Crude OR (95% CI)                               | 1.00                                     | 1.02 (0.74, 1.40)     | 1.19 (0.84, 1.68)       |
| Adjusted OR (95% CI) $\xi$                      | 1.00                                     | 1.07 (0.78, 1.48)     | 1.30 (0.91, 1.85)       |

CI=confidence interval, OR=odds ratio, AGS<sub>max</sub>=maximum of the right or left absolute grip strength, RGS<sub>max</sub>=maximum of the right or left relative grip strength, RGS<sub>mean</sub>=average of the right and left relative grip strength, RGS<sub>left</sub>=the left relative grip strength, RGS<sub>right</sub>=the right relative grip strength, TUGT=timed up-and-go test.

$\xi$ Adjusted for sex, age, education, family income, occupation, physical activity, smoking status, alcohol use, body mass index (BMI, except for RGS), and self-reported hypertension.

\* $P < 0.05$ , \*\* $P < 0.01$ , \*\*\* $P < 0.001$ .

**Table S4 Associations of spot urinary sodium concentrations (mmol/L) with grip strength, timed up-and-go test, and falls on 1324 participants of the Guangzhou Biobank Cohort Study**

|                                               | Spot urinary sodium concentrations (mmol/L) |                       |                       |                       |
|-----------------------------------------------|---------------------------------------------|-----------------------|-----------------------|-----------------------|
|                                               | Quartile 1<br>(n=342)                       | Quartile 2<br>(n=330) | Quartile 3<br>(n=313) | Quartile 4<br>(n=339) |
| AGS <sub>max</sub> , kg                       |                                             |                       |                       |                       |
| Crude $\beta$ (95% CI)                        | 0.00                                        | −0.26 (−1.67, 1.16)   | 0.67 (−0.77, 2.10)    | 1.92 (0.51, 3.33) **  |
| Adjusted $\beta$ (95% CI) $\xi$               | 0.00                                        | −0.73 (−1.77, 0.31)   | −0.27 (−1.33, 0.79)   | 0.98 (−0.07, 2.02)    |
| RGS <sub>max</sub> , kg per kg/m <sup>2</sup> |                                             |                       |                       |                       |
| Crude $\beta$ (95% CI)                        | 0.00                                        | −0.001 (−0.06, 0.06)  | 0.02 (−0.04, 0.08)    | 0.08 (0.02, 0.15) *   |
| Adjusted $\beta$ (95% CI) $\xi$               | 0.00                                        | −0.03 (−0.07, 0.02)   | −0.02 (−0.07, 0.03)   | 0.04 (−0.01, 0.08)    |

|                                                 |      |                       |                     |                      |
|-------------------------------------------------|------|-----------------------|---------------------|----------------------|
| RGS <sub>mean</sub> , kg per kg/m <sup>2</sup>  |      |                       |                     |                      |
| Crude $\beta$ (95% CI)                          | 0.00 | -0.002 (-0.06, 0.06)  | 0.02 (-0.04, 0.08)  | 0.08 (0.02, 0.14)    |
| Adjusted $\beta$ (95% CI) $^{\xi}$              | 0.00 | -0.03 (-0.07, 0.02)   | -0.02 (-0.07, 0.03) | 0.04 (-0.01, 0.08)   |
| RGS <sub>left</sub> , kg per kg/m <sup>2</sup>  |      |                       |                     |                      |
| Crude $\beta$ (95% CI)                          | 0.00 | -0.0004 (-0.06, 0.06) | 0.02 (-0.05, 0.08)  | 0.08 (0.02, 0.14)    |
| Adjusted $\beta$ (95% CI) $^{\xi}$              | 0.00 | -0.03 (-0.07, 0.02)   | -0.02 (-0.07, 0.03) | 0.03 (-0.01, 0.08)   |
| RGS <sub>right</sub> , kg per kg/m <sup>2</sup> |      |                       |                     |                      |
| Crude $\beta$ (95% CI)                          | 0.00 | -0.003 (-0.06, 0.06)  | 0.02 (-0.04, 0.09)  | 0.08 (0.02, 0.15) ** |
| Adjusted $\beta$ (95% CI) $^{\xi}$              | 0.00 | -0.03 (-0.08, 0.02)   | -0.01 (-0.06, 0.04) | 0.04 (-0.01, 0.09)   |
| TUGT score, second                              |      |                       |                     |                      |
| Crude $\beta$ (95% CI)                          | 0.00 | -0.03 (-0.14, 0.08)   | -0.04 (-0.15, 0.07) | -0.03 (-0.14, 0.08)  |
| Adjusted $\beta$ (95% CI) $^{\xi}$              | 0.00 | -0.05 (-0.14, 0.05)   | -0.05 (-0.15, 0.05) | -0.004 (-0.10, 0.09) |
| Falls in the past 6 months                      |      |                       |                     |                      |
| Crude OR (95% CI)                               | 1.00 | 0.87 (0.44, 1.71)     | 0.74 (0.36, 1.52)   | 0.73 (0.36, 1.49)    |
| Adjusted OR (95% CI) $^{\xi}$                   | 1.00 | 0.86 (0.43, 1.72)     | 0.73 (0.35, 1.52)   | 0.77 (0.37, 1.59)    |

CI=confidence interval, OR=odds ratio, AGS<sub>max</sub>=maximum of the right or left absolute grip strength, RGS<sub>max</sub>=maximum of the right or left relative grip strength, RGS<sub>mean</sub>=average of the right and left relative grip strength, RGS<sub>left</sub>=the left relative grip strength, RGS<sub>right</sub>=the right relative grip strength, TUGT=timed up-and-go test.

$^{\xi}$ Adjusted for sex, age, education, family income, occupation, physical activity, smoking status, alcohol use, body mass index (BMI, except for RGS), systolic blood pressure (SBP), diastolic blood pressure (DBP), and antihypertensive drugs use.

\* $P<0.05$ , \*\* $P<0.01$ , \*\*\* $P<0.001$ .
